# Supplementary material for: flyDIVaS: A Comparative Genomics Resource for Drosophila Divergence and Selection
Source: PubMed Central journal article supplement (PMC4978890; doi:10.1534/g3.116.031138), 2016-05-25
Supplement: supp_g3.116.031138_FigureS6.pdf [file supp_g3.116.031138_FigureS6.pdf]

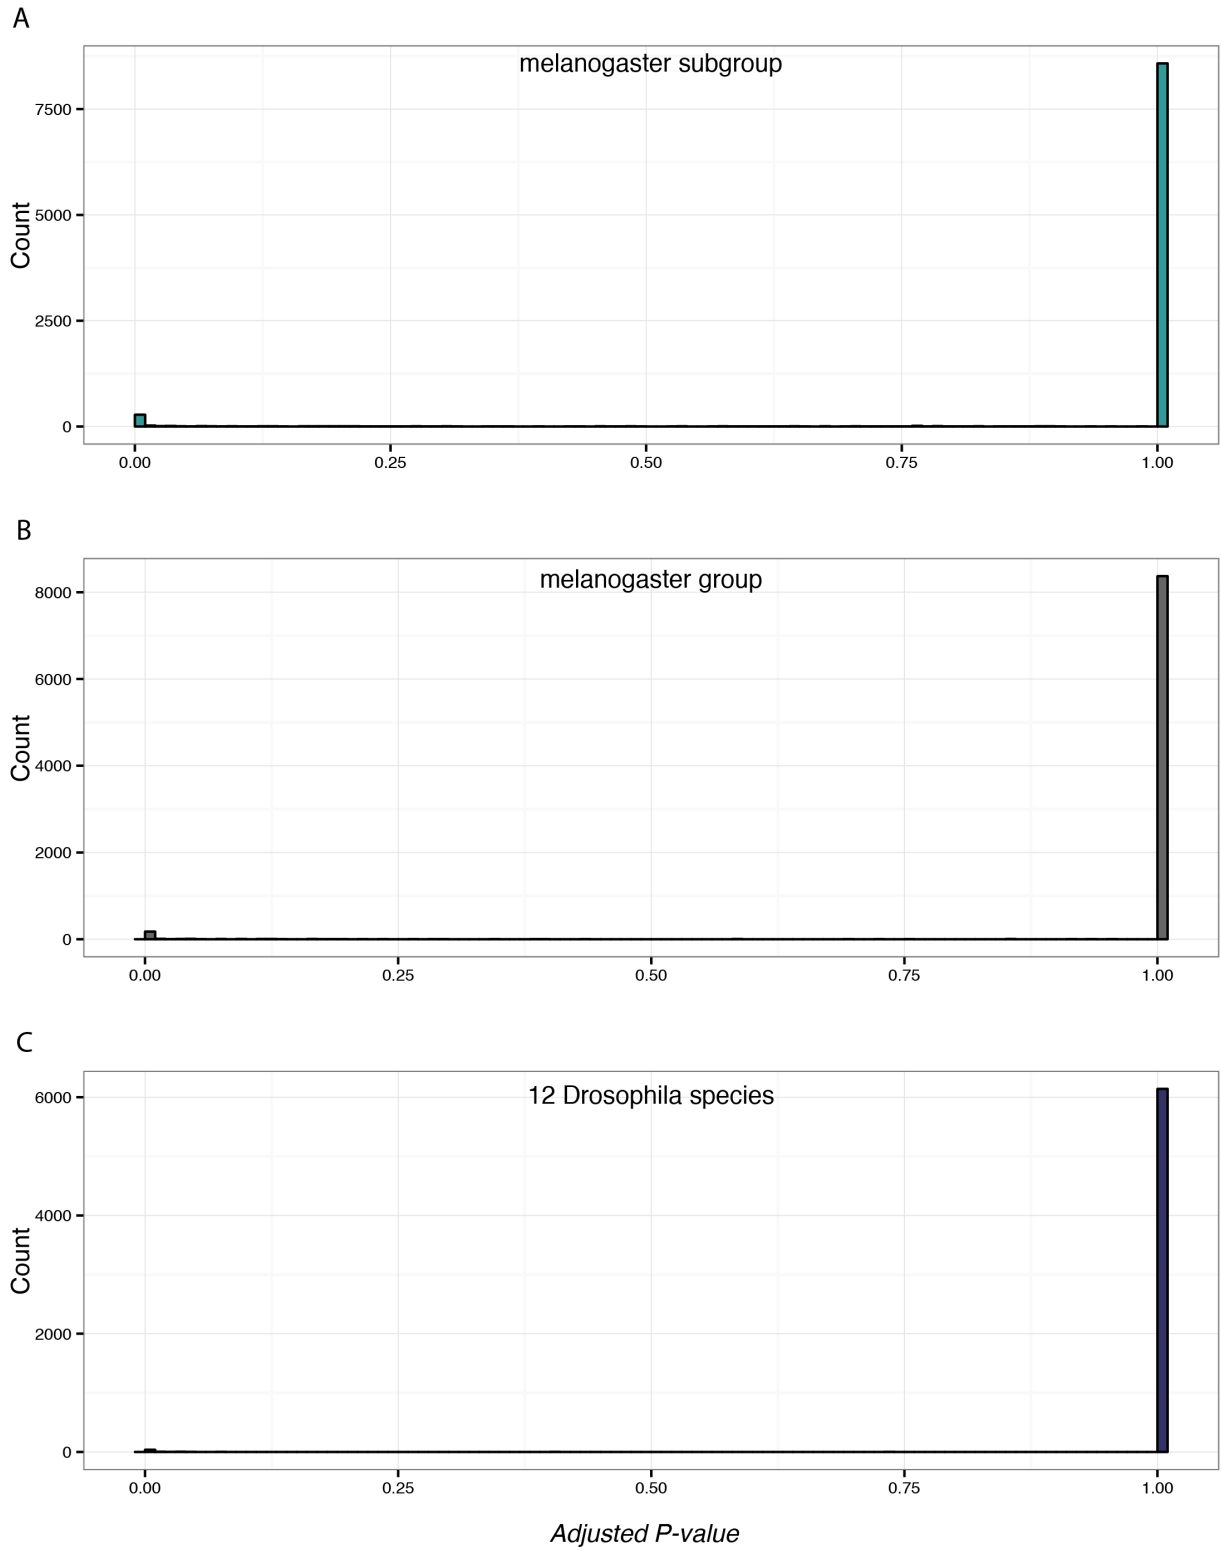

Figure S6
